# Supplementary material
Source: Springer Nature journal article supplement (https://www.springermedizin.de/resource/supplementary/12884_2009_230_MOESM3_ESM.pdf/9459904)
Supplement: MOESM3 [file 9459904]

## تعرفي على طفلك

لقد قطعت الآن شوطاً طويلاً في حملك، ومن المرجح أنك بدأت تشعرين بضربات الطفل. تساعدك مراجعات الحمل الطبية في متابعة مدى ارتياح الطفل، ولكنك كأم تبقيين الوحيدة التي بإمكانها معرفة مدى ارتياحه حتى قبل ولادته. إن ما يعبر عنه الطفل بضرباته يعتبر مهماً.

سوف تقضين وقتاً طويلاً بعد الولادة من أجل الاعتناء بطفلك. لذا نحثك على استخدام بعض من وقتك يومياً للتعرف على طفلك أثناء حملك وذلك من خلال متابعتك لحركته. سوف تجدين هنا معلومات وافية عن معنى الضربات، وكذلك التوجيهات لمعرفة كيفية متابعتها وذلك للتأكد من مدى ارتياح طفلك.

إن تخصيص وقت للتعرف على الطفل هو عادة جيدة.

## كيف تخبر الضربات عن مدى الارتياح؟

ينتقل بواسطة المشيمة كل ما يحتاجه الطفل منك. يبقى الطفل يتحرك لطالما أن هذا الانتقال يتم بشكل جيد. أما إذا كان هذا الانتقال ضعيفاً أو إذا الطفل مريضاً فتضعف عندها حركته، وذلك لأنه يتوجب عليه اختزان طاقاته من أجل استخدامها في النمو. إذا كنت تدخنين، فإن ذلك يؤثر على الطفل والمشيمة بشكل مباشر وبالتالي تضعف حركة الطفل. إذا أصبح تقاعس المشيمة كبيراً، يؤخر هذا عملية النمو، ويمكن أن يؤدي إلى مرض خطير عند الطفل أو إصابته بأذى. كما يصبح تحمله للولادة ضعيفاً، إن ما ذكر يحدث نادراً وخاصة إذا كانت ضربات الطفل طبيعية.

يعم الهدوء في بعض الأحيان، ولكن هذا لا يعني شيئاً، إلا إذا كان هناك تباطؤ كبير في ضربات الطفل المعتادة. عندما تشعرين بدلائل حياة متوازنة في داخلك، فهذه إشارة بأن طفلك وضعه جيد. إن شعورك بضربات طفلك يساعدك على التقرب منه أكثر. لهذا فمن الجيد أن تعدي ضرباته لتتابعي ارتياحه.

## لهذا السبب نعد ضربات الطفل

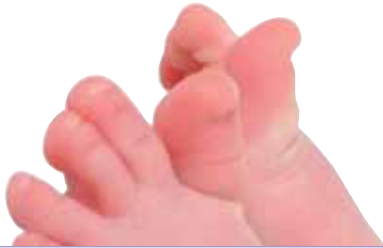

## ماذا يعني أن يضرب الطفل في أحشائك؟

### أحياناً يعم الهدوء

ينام طفلك مرات عديدة في اليوم، عندها يعم الهدوء بشكل تام. تطول فترات نوم الطفل مع التقدم في الحمل. ولكن نادراً ما ينام أكثر من ساعة في كل مرة وذلك عند اقتراب موعد ولادته. يكون معظمهم أكثر نشاطاً في المساء، والكثيرون منهم أيضاً يكونون أكثر نشاطاً في الصباح الباكر.

يمكن أن يكون هناك اختلاف كبير بين طفل وآخر في حجم وقوة ضرباته، ونقصد بالضربات هنا جميع أشكال الحركات. الأطفال الذين يتحركون أكثر من غيرهم يكونون في الغالب أكثر نشاطاً بعد الولادة أيضاً. ومن الممكن أن يتمتع الجميع بنفس القدر من العافية. لم يعرف بعد بأن هناك اختلاف بين الذكور والإناث.

إن احساس بعض الأمهات بالحركة أضعف من غيرهن. فإذا كان توضع المشيمة أمام الرحم أو إذا كانت الأم بدينة يصبح الاحساس بالحركة أضعف. يمكنك التدريب على الاحساس بالحركة في نفس الوقت الذي ترين فيه بطنك يتحرك. إن شعورك بالضربات يكون أكثر عندما تستلقيين وأقل عندما تقفين أو تمشين أو عندما تكونين مشغولة بشيء ما.

### ماذا يفعل الطفل في الداخل؟

يبقى الطفل نشيطاً طوال فترة الحمل. إن أكثر مايفعله هو حركات تنفس لاتشعرين بها. وهكذا تتوسع رنتاه من خلال التمارين التي يقوم بها ليهيء نفسه لما بعد الولادة. يصاب الطفل في بعض الأحيان بالحازوقة والتي تشعرين بها على شكل رعشة بسيطة ومنظمة.

يقوم الطفل بإجراء حركات صغيرة وكبيرة في أحشائك. إن الحركات الصغيرة كمص سبائته أو انحنائه أو مد أصابع يديه وقدميه هي حركات لاتشعرين بها، أما معظم الضربات والدفع الذي يقوم به الطفل في الداخل تشعرين به بشكل واضح وذلك في الفترات الأخيرة من الحمل. تكون معظم حركات جسمه الكبيرة واضحة، ويمكن أن تحدث مثلاً: عندما تغيرين من وضعية الوقوف إلى الاستلقاء، عندها يميل الطفل ويحرك نفسه قليلاً رداً على حركتك هذه، كما يقوم غالباً بالدفع عندما تدفعه قليلاً.

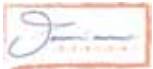

الصورة : Per Oscar Skjellnan

التصميم : Marianne Bratt Ricketts • www.mariannedesign.no

[arabisk]

...ضربات الطفل هي ليست  
للتسلية فقط...

kicks  
count

[www.kickscout.no](http://www.kickscout.no)

## شارك في البحث القائم حول العلاقة بين نشاط ضربات الجنين وصحته.

نرغب في دعوتك للمشاركة في البحث، وذلك عن طريق تسليم هذه الاستمارة بعد ولادتك، وذلك في حال أنك ولدت طفلاً واحداً، ومشاركتك هذه غير مرتبطة باستخدامك لاستمارة الضربات أو عدمه.

### من ولماذا؟

تجرى حالياً وبإشراف المعهد الصحي الشعبي (Folkehelseinstituttet)، و المركز الطبي للبحوث المتعلقة بفترة ما قبل وبعد الولادة، و العيادة النسائية في مشفى (Rikshospitalet Radiumhospitalet HF)، و جمعية النساء المسعفات، أبحاث حول العلاقة بين نشاط ضربات الطفل في البطن ومستقبله الصحي. نحن نعلم أن الضعف الكبير في ضربات الطفل أو توقفها مرتبط بخطورة تعرضه للأمراض أو وفاته. ولكن معرفتنا قليلة حول كيفية استخدام ذلك وبمساعدة معلومات أخرى متعلقة بنشاط ضربات الطفل في البطن للوصول إلى طفل معافى على المدى القريب والبعيد.

### المشاركة طوعية، ويمكنك المساهمة بذلك إما قليلاً أو كثيراً .

من المهم ولصالح البحث المجرى أن تقوم أكثرهن بتسليم هذه الاستمارة وذلك قبل مغادرتهن قسم الولادة والنفاس. إن لهذه الاستمارة قيمة كبيرة في البحث، حتى وإن لم تستخدم استمارة الضربات أو أنك لا ترغبين في إعطاء معلومات عن نفسك. تزداد هذه القيمة بقدر مساهمتك يستحسن بك إذا كنت لم تبلغ الثامنة عشر من العمر استشارة أولياء أمرك. يمكنك وكلائي تحديد مدى مساهمتك الشخصية في البحث :

### هل تريدين أن تبقي غير معلنة؟

دوني المعلومات في أسفل هذه الصفحة، وامنحي موافقتك وذلك بوضع اشارة ضرب هنا :

### هل بإمكانك المساهمة أكثر؟

يمكنك منح الموافقة على جعل المعلومات الواردة في استمارتك

ترتبط مباشرة ببيانات الولادة الطبية، وذلك من خلال تدوين تاريخ

ميلادك ورقمك الشخصي والتوقيع هنا:

أو

إذا كنت ستشاركين في البحث النرويجي وهو " الأم والطفل"، يمكنك عندها

منح موافقتك لجعل المعلومات الواردة في استمارتك تستخدم في البحث

وذلك بكتابة رقمك الشخصي والتوقيع هنا:

الرقم الشخصي:

التوقيع: \_\_\_\_\_

الرقم الشخصي:

التوقيع: \_\_\_\_\_

### هل المشاركة آمنة؟

تقع على عاتق معهد الصحة الشعبي مسؤولية الحفاظ على سرية المعلومات الخاصة بك. يملك المعهد إجازة خاصة من قبل دائرة مراقبة الحاسوب، كما تقدم له الارشادات من قبل لجنة البحوث الخاصة بالأخلاق المهنية وذلك من أجل المحافظة على المعلومات الخاصة بك وبطفلك.

يقوم معهد الصحة الشعبي في أقرب وقت يتم فيه تسجيل المعلومات الخاصة بك، وربطك بالمعلومات التي وافقت على منحها، بجعل تلك المعلومات غير معلنة. هذا يعني أن استمارتك تلتف وجميع المعلومات الخاصة بهويتك تحمى وذلك قبل اطلاق الباحثين عليها.

### أين بإمكانني تسليم الاستمارة؟

هناك صندوق معنون في جميع أقسام الولادة والنفاس. أسألي العاملين هناك إذا لم تجديه.

|                                                                                                       |                                                                                                                                                                                                         |
|-------------------------------------------------------------------------------------------------------|---------------------------------------------------------------------------------------------------------------------------------------------------------------------------------------------------------|
| لا أريد اعطاء أية معلومات .....                                                                       | <input type="checkbox"/>                                                                                                                                                                                |
| في أي من أسابيع حملك تمت ولادتك؟ .....                                                                | <input type="checkbox"/> <input type="checkbox"/>                                                                                                                                                       |
| (الاسبوع رقم 40 هو اسبوع الولادة)                                                                     |                                                                                                                                                                                                         |
| كيف تمت ولادتك؟                                                                                       |                                                                                                                                                                                                         |
| ولادة طبيعية (مهبلية).....                                                                            | <input type="checkbox"/>                                                                                                                                                                                |
| ولادة قيصرية مخطط لها.....                                                                            | <input type="checkbox"/>                                                                                                                                                                                |
| ولادة قيصرية تم تقريرها أثناء الولادة .....                                                           | <input type="checkbox"/>                                                                                                                                                                                |
| ولادة قيصرية سريعة .....                                                                              | <input type="checkbox"/>                                                                                                                                                                                |
| جنس المولود                                                                                           | ذكر <input type="checkbox"/> أنثى <input type="checkbox"/>                                                                                                                                              |
| وزن الطفل عند الولادة                                                                                 | <input type="checkbox"/> <input type="checkbox"/> <input type="checkbox"/> <input type="checkbox"/> غرام                                                                                                |
| كيف سارت الأمور مع الطفل؟                                                                             |                                                                                                                                                                                                         |
| كان الطفل معافى.....                                                                                  | <input type="checkbox"/>                                                                                                                                                                                |
| تم إدخال الطفل إلى قسم حديثي الولادة /قسم الأطفال.....                                                | <input type="checkbox"/>                                                                                                                                                                                |
| توفي الطفل .....                                                                                      | <input type="checkbox"/>                                                                                                                                                                                |
| عمرك.....سنة <input type="checkbox"/> <input type="checkbox"/>                                        |                                                                                                                                                                                                         |
| وزنك قبل الحمل .....                                                                                  | <input type="checkbox"/> <input type="checkbox"/> <input type="checkbox"/>                                                                                                                              |
| طولك.....                                                                                             | <input type="checkbox"/> <input type="checkbox"/> <input type="checkbox"/>                                                                                                                              |
| بعدد صحيح من الكغ                                                                                     |                                                                                                                                                                                                         |
| بعدد صحيح من السم                                                                                     |                                                                                                                                                                                                         |
| كم عدد الأطفال الذين أنجبتيهم مسبقاً                                                                  | <input type="checkbox"/> <input type="checkbox"/>                                                                                                                                                       |
| هل قمت بالتخين في الشهر الأخير من حملك هذا؟                                                           |                                                                                                                                                                                                         |
| لا .....                                                                                              | <input type="checkbox"/>                                                                                                                                                                                |
| بعض الأحيان .....                                                                                     | <input type="checkbox"/> <input type="checkbox"/>                                                                                                                                                       |
| يوميًا .....                                                                                          | <input type="checkbox"/> <input type="checkbox"/>                                                                                                                                                       |
| هل لغتك الأم هي لغة أخرى غير النرويجية؟..... نعم <input type="checkbox"/> لا <input type="checkbox"/> |                                                                                                                                                                                                         |
| إذا كان الجواب نعم، فما هي اللغة؟                                                                     | <input type="checkbox"/> |
